# Supplementary material
Source: PubMed Central journal article supplement (PMC4763367)
Supplement: aasm.39.3.551s1.pdf [file aasm.39.3.551s1.pdf]

## **Section 1: Further information relating to methods**

**Covariates.** Based on a review of the literature, variables that were potential confounders, that is, associated with both insomnia and dyslipidemia, were identified.<sup>1-5</sup> These variables included: sex, age, race, total household income, ever smoking (defined as having smoked at least 100 cigarettes in one's life), alcohol consumption over the past year, frequency of experiencing depressed mood and anhedonia over the previous 2 w, current self-reported use of any sleeping pill or pill to help with sleep (either prescription or nonprescription), ever doctor-diagnosed self-reported high cholesterol, current receipt of lipid-lowering medication, ever doctor-diagnosed diabetes, current receipt of diabetes pills or insulin, and, items contained in the Berlin Questionnaire (i.e., body mass index based on measured height and weight; frequency of reported snoring and/or apneas; frequency of reported daytime fatigue; frequency of daytime sleepiness; and, hypertension [based ever doctor-diagnosis or current receipt of antihypertensive medications]). The Berlin Questionnaire is a validated screening instrument for obstructive sleep apnea (for a respiratory distress index  $\geq 5$  events per hour, the sensitivity and specificity of the Berlin Questionnaire are 86% and 77%).<sup>6</sup> Individuals for whom covariate information was missing (which represented a small proportion of all survey participants) were included in unadjusted analyses and excluded from multivariable analyses.

**Sensitivity analyses.** Several sensitivity analyses were performed. First, dyslipidemia was evaluated separately for men and women, since a previous study found increased dyslipidemia among women with insomnia symptoms, but not men.<sup>7</sup> Second, dyslipidemia was evaluated separately by insomnia symptom subtype experienced (i.e., difficulty falling asleep versus prolonged nocturnal awakening versus early morning awakening). This analysis was

undertaken because a few previous studies have found difficulty falling asleep, but not difficulty maintaining sleep or early morning awakening, to be associated with increased cardiovascular mortality.<sup>8-11</sup> If a participant reported more than one type of insomnia symptom, he or she was included and analyzed in each of the reported insomnia symptom subgroups. Third, analyses were undertaken distinguishing by the frequency of insomnia symptoms experienced (i.e., 0 to 4 times in the past month versus 5 to 15 times in the past month versus 16 to 30 times in the past month). This analysis was undertaken because a few previous studies have found increased risk of negative cardiovascular outcomes among those experiencing insomnia symptoms frequently, but not among individuals experiencing insomnia symptoms occasionally or less.<sup>7,11-13</sup> If a participant reported experiencing more than one type of insomnia symptom, participants' insomnia frequency status was based on the most frequent insomnia symptom experienced. Fourth, the association between insomnia symptoms and dyslipidemia was examined distinguishing by whether or not individuals were recently receiving sleeping pills or pills to help with sleep (defined as medication receipt within the past month, either prescription or non-prescription). This analysis was undertaken because receipt of sleeping pills may be a marker of having more severe insomnia and identifying a possible 'symptom severity-response' relationship is relevant. Receipt of sleeping pills may also potentially influence the presence of dyslipidemia (i.e., sleeping pills, which can improve insomnia symptoms, might lessen dyslipidemia if a true link between insomnia and dyslipidemia exists, but at the same time use of sleeping pills has also been linked with increased all-cause mortality).<sup>14,15</sup> Fifth, analyses were separately conducted among individuals experiencing (or not) concomitant daytime fatigue. Individuals with combined insomnia and daytime fatigue likely reflect a subgroup experiencing more severe insomnia and/or of insomnia of more chronic duration and it is relevant to evaluate for possible

dyslipidemia among this more symptomatic subgroup. Sixth, dyslipidemia was examined by distinguishing the presence or not of short sleep time on most nights (defined as < 6 h of sleep). Individuals with insomnia symptoms coupled with short sleep time may reflect another more symptomatic subset of individuals worthy of evaluating. A cutoff of less than 6 h of sleep to denote short sleep time has been previously used in the literature.<sup>16,17</sup> Seventh, the association between insomnia symptoms and dyslipidemia was examined separately among individuals with and without doctor-diagnosed dyslipidemia. Individuals with previously diagnosed dyslipidemia may have made lifestyle modifications or be on lipid-lowering pharmacotherapy, which could in turn influence the finding of dyslipidemia. Finally, the association between insomnia symptoms and dyslipidemia was examined by distinguishing whether or not individuals were receiving lipid-lowering medications at the time of survey administration.

## **REFERENCES**

1. Vozoris NT. The relationship between insomnia symptoms and hypertension using United States population-level data. *J Hypertens* 2013;31:663–71.
2. Vozoris NT. Insomnia symptom frequency and hypertension risk: a population-based study. *J Clin Psychiatry* 2014;75:616–23.
3. Vozoris NT. Sleep apnea-plus: prevalence, risk factors, and association with cardiovascular diseases using United States population-level data. *Sleep Med* 2012;13:637–44.
4. Gardner CD, Winkleby MA, Fortmann SP. Population frequency distribution of non-high-density lipoprotein cholesterol (Third National Health and Nutrition Examination Survey [NHANES III], 1988-1994). *Am J Cardiol* 2000;86:299–304.

5. Gunnarsson SI, Peppard PE, Korcarz CE, et al. Obstructive sleep apnea is associated with future subclinical carotid artery disease: thirteen-year follow-up from the Wisconsin sleep cohort. *Arterioscler Thromb Vasc Biol* 2014;34:2338–42.
6. Netzer NC, Stoohs RA, Netzer CM, Clark K, Strohl KP. Using the Berlin Questionnaire to identify patients at risk for the sleep apnea syndrome. *Ann Intern Med* 1999;131:485–91.
7. Zhan Y, Zhang F, Lu L, et al. Prevalence of dyslipidemia and its association with insomnia in a community based population in China. *BMC Public Health* 2014;14:1050.
8. Eaker ED, Pinsky J, Castelli WP. Myocardial infarction and coronary death among women: psychosocial predictors from a 20-year follow-up of women in the Framingham Study. *Am J Epidemiol* 1992;135:854–64.
9. Nilsson PM, Nilsson JA, Hedblad B, Berglund G. Sleep disturbance in association with elevated pulse rate for prediction of mortality--consequences of mental strain? *J Intern Med* 2001;250:521–9.
10. Mallon L, Broman JE, Hetta J. Sleep complaints predict coronary artery disease mortality in males: a 12-year follow-up study of a middle-aged Swedish population. *J Intern Med* 2002;251:207–16.
11. Li Y, Zhang X, Winkelman JW, et al. Association between insomnia symptoms and mortality: a prospective study of U.S. men. *Circulation* 2014;129:737–46.
12. Chien KL, Chen PC, Hsu HC, et al. Habitual sleep duration and insomnia and the risk of cardiovascular events and all-cause death: report from a community-based cohort. *Sleep* 2010;33:177–84.
13. Laugsand LE, Vatten LJ, Platou C, Janszky I. Insomnia and the risk of acute myocardial infarction: a population study. *Circulation* 2011;124:2073–81.

14. Kripke DF, Garfinkel L, Wingard DL, Klauber MR, Marler MR. Mortality associated with sleep duration and insomnia. *Arch Gen Psychiatry* 2002;59:131–6.
15. Kripke DF, Langer RD, Kline LE. Hypnotics' association with mortality or cancer: a matched cohort study. *BMJ Open* 2012;2:e000850.
16. Vgontzas AN, Liao D, Bixler EO, Chrousos GP, Vela-Bueno A. Insomnia with objective short sleep duration is associated with a high risk for hypertension. *Sleep* 2009;32:491–7.
17. Fernandez-Mendoza J, Vgnontzas AN, Liao D, et al. Insomnia With Objective Short Sleep Duration and Incident Hypertension: The Penn State Cohort. *Hypertension* 2012;60:929–35.

## **Section 2: Analysis examining the relationship between insomnia symptoms and self-reported current receipt of lipid-lowering agents**

Insomnia symptoms in relation to self-reported receipt of any lipid-lowering medication at the time of survey administration was also examined. Forced entry multiple logistic regression was used. Unadjusted odds ratios (OR) and 95% confidence intervals (CI) were first calculated. A second regression model was run that included the following covariates: sex, age, race, education level, total household income, ever smoking, alcohol consumption over the past year, depressed mood and anhedonia over the previous 2 w, body mass index, doctor-diagnosed hypertension, current receipt of antihypertensive medication, doctor-diagnosed diabetes, current receipt of diabetes pills or insulin, current receipt of any sleeping pill, and frequency of reported snoring and/or apneas. A third regression model was run including all of the variables in the second model, plus frequency of reported daytime fatigue and frequency of daytime sleepiness. Several sensitivity analyses were performed, distinguishing results by sex, receipt of sleeping pills or not within the past month, concomitant presence or not of daytime fatigue symptoms, presence or not of short sleep time most nights (defined as < 6 h), insomnia symptom subtype (i.e., sleep initiation insomnia, sleep maintenance insomnia, early morning awakening insomnia), and insomnia symptom frequency category (i.e., 0 to 4 times in the past month versus 5 to 15 times in the past month versus 16 to 30 times in the past month).

Results for this analysis are shown in Supplementary Table 1. Among individuals ages 20 y and older for whom insomnia data were available, data on current receipt of lipid-lowering drugs was available for 10,448 individuals, of whom 15.0% were taking lipid-lowering drugs at the time of survey administration. In unadjusted analyses, having any insomnia symptom at least five times in the past month was associated with increased odds of lipid-lowering medication

receipt (OR 1.16, 95% CI 1.01-1.34). However, these odds decreased and the statistical significance was lost after adjusting for covariates (OR 1.02, 95% CI 0.83-1.25). There was no association between insomnia symptoms and lipid-lowering drug receipt among men, but there were increased unadjusted odds of lipid-lowering drug use among women with any insomnia symptom at least five times in the past month (OR 1.21, 95% CI 1.01-1.44). This finding, however, became nonsignificant after adjusting for covariates (OR 1.08, 95% CI 0.80-1.46). Individuals with insomnia symptoms coupled with daytime fatigue had elevated unadjusted odds of lipid-lowering drug use (OR 1.64, 95% CI 1.28-2.11), but this result was rendered nonsignificant after covariate adjustment (OR 1.28, 95% CI 0.93-1.77). Individuals with sleep maintenance insomnia and early morning awakening insomnia subtypes had increased unadjusted odds of receipt of lipid-lowering medications, but these results too became nonsignificant after covariate adjustment. Individuals experiencing insomnia symptoms the most frequently (i.e., 16 to 30 times in the past month) had unadjusted increased odds of lipid-lowering medication receipt (OR 1.21, 95% CI 1.01-1.49), but significance was lost after controlling for covariates (OR 1.09, 95% CI 0.84-1.40). None of the remaining sensitivity analyses yielded significant results.

In summary, although increased odds of lipid-lowering medication receipt among individuals with insomnia symptoms were found for the entire group and for certain subgroups in unadjusted analyses, these results were related to covariate confounding. The absence of any significant association between insomnia symptoms and receipt of lipid-lowering medication after adjusting for covariates makes the main findings of this study even more robust, that there is no true link between insomnia symptoms and dyslipidemia.

**Table S1.** Frequency and odds of current lipid-lowering drug receipt among individuals with insomnia symptoms

|                                                           | Number (%) with drug receipt | Unadjusted OR (95% CI) for drug receipt | Adjusted <sup>†</sup> OR (95% CI) for drug receipt | Adjusted <sup>‡</sup> OR (95% CI) for drug receipt |
|-----------------------------------------------------------|------------------------------|-----------------------------------------|----------------------------------------------------|----------------------------------------------------|
| <b>Any insomnia symptom, at least 5 times/month*</b>      |                              |                                         |                                                    |                                                    |
| All individuals                                           | 526 (5.0)                    | 1.16 (1.01-1.34)                        | 1.02 (0.83-1.25)                                   | 0.98 (0.81-1.19)                                   |
| Men                                                       | 209 (4.2)                    | 1.13 (0.91-1.41)                        | 0.92 (0.67-1.26)                                   | 0.87 (0.63-1.19)                                   |
| Women                                                     | 316 (5.8)                    | 1.21 (1.01-1.44)                        | 1.12 (0.82-1.52)                                   | 1.08 (0.80-1.46)                                   |
| Individuals receiving sleeping pills                      | 220 (10.9)                   | 0.99 (0.74-1.32)                        | 0.99 (0.68-1.44)                                   | 0.96 (0.65-1.41)                                   |
| Individuals not receiving sleeping pills                  | 305 (3.6)                    | 1.08 (0.90-1.29)                        | 1.04 (0.82-1.33)                                   | 0.98 (0.77-1.26)                                   |
| Individuals with daytime fatigue                          | 284 (10.2)                   | 1.64 (1.28-2.11)                        | 1.28 (0.93-1.77)                                   | not applicable                                     |
| Individuals without daytime fatigue                       | 242 (3.2)                    | 1.05 (0.88-1.25)                        | 0.87 (0.69-1.11)                                   | not applicable                                     |
| Individuals with usually < 6 hours of total sleep time    | 144 (9.8)                    | 1.31 (0.93-1.83)                        | 0.89 (0.49-1.61)                                   | 0.76 (0.42-1.39)                                   |
| Individuals with usually ≥ 6 hours of total sleep time    | 378 (4.2)                    | 1.14 (0.97-1.35)                        | 1.03 (0.82-1.30)                                   | 1.01 (0.81-1.25)                                   |
| <b>Insomnia symptom subtypes, at least 5 times/month*</b> |                              |                                         |                                                    |                                                    |
| Initiation insomnia                                       | 291 (2.8)                    | 1.10 (0.91-1.33)                        | 1.17 (0.92-1.49)                                   | 1.14 (0.90-1.44)                                   |
| Maintenance insomnia                                      | 373 (4.0)                    | 1.23 (1.05-1.46)                        | 1.09 (0.86-1.38)                                   | 1.04 (0.83-1.30)                                   |
| Early morning awakening insomnia                          | 310 (3.0)                    | 1.24 (1.03-1.48)                        | 1.09 (0.84-1.41)                                   | 1.05 (0.79-1.38)                                   |
| <b>Any insomnia symptom, by increasing frequency</b>      |                              |                                         |                                                    |                                                    |
| 0-4 times/month                                           | 1046 (10.0)                  | 1.00                                    | 1.00                                               | 1.00                                               |
| 5-14 times/month                                          | 298 (2.2)                    | 1.12 (0.94-1.34)                        | 0.98 (0.76-1.26)                                   | 0.95 (0.75-1.20)                                   |
| 16-30 times/month                                         | 227 (11.6)                   | 1.22 (1.01-1.49)                        | 1.09 (0.84-1.40)                                   | 1.03 (0.80-1.33)                                   |

\*Reference group includes individuals without any insomnia symptoms or insomnia symptoms less than 5 times/month. †Adjusted for sex, age, race, education level, total household income, ever-smoking, ever alcohol consumption in the past year, depression symptoms in the past 2 weeks, measured body mass index, ever doctor-diagnosed hypertension, current receipt of antihypertensive medications, ever doctor-diagnosed diabetes, current receipt of diabetes pills or insulin, and self-reported history of apneas or snoring. ‡Adjusted for all the variables in the previous model, plus self-reported daytime fatigue and sleepiness.
